# Supplementary material
Source: Springer Nature journal article supplement (https://www.springermedizin.de/resource/supplementary/12879_2013_3097_MOESM2_ESM.pdf/9446002)

Proportion of deaths

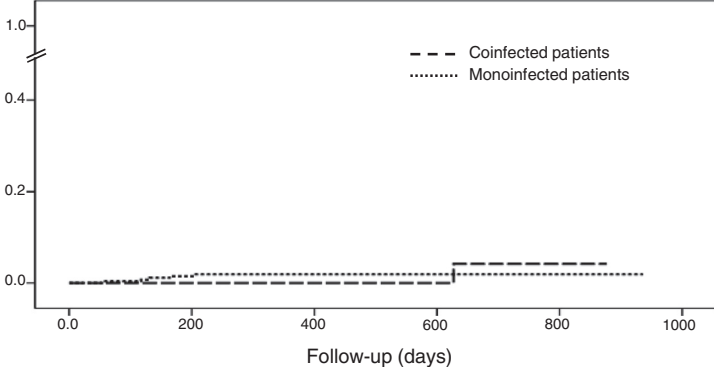

--- Coinfecting patients

..... Mono-infecting patients

Follow-up (days)

Supplement: MOESM2 [file 9446002]
